# Supplementary material for: Occurrence of pharmaceuticals and personal care products, and their associated environmental risks in Guanting Reservoir and its upstream rivers in north China
Source: Royal Society of Chemistry journal article supplement (doi:10.1039/c7ra12945a), 2018-01-01
Supplement: c7ra12945a1.pdf [file c7ra12945a1.pdf]

Occurrence of pharmaceuticals and personal care products, and their  
associated environmental risks in Guanting Reservoir and its upstream  
rivers in north China

Panwei Zhang,<sup>ab</sup> Huaidong, Zhou,<sup>ab</sup> Kun Li,<sup>ab</sup> Xiaohui Zhao,<sup>ab</sup> Qiaona Liu,<sup>ab</sup> Dongjiao Li,  
<sup>b</sup>Gaofeng Zhao,<sup>\*ab</sup> Liang Wang<sup>b</sup>

<sup>a</sup>: State Key Laboratory of Regulation of Water Cycle in River Basin, China Institute of Water  
Resource and Hydropower Research, Beijing, 100038, *P.R.* China.

<sup>b</sup>: China Institute of Water Resources and Hydropower Research, Beijing 100038, *P.R.* China

\*Corresponding Author

Email: zhaogf@iwhr.com

Tel: +86-1068781893

Fax:

+86-1068573618

Table S1 Basic information of eighteen selected PPCPs

Table S2 Sampling site information for samples of Guanting Reservoir

Table S3 Experimental conditions of electrospray tandem mass spectrometry

Table S4 Water quality parameters in surface water samples collected from Guanting Reservoir and its upstream rivers

Table S5 Environmental risk assessment for selected PPCPs in GTR and its upstream rivers

Table S1. Basic information of eighteen selected PPCPs

| Classes                                | Compound          | acronym | CAS no.    | molecular formula                                               | $\log k_{ow}^a$ | pKa <sup>a</sup> | classification                   |
|----------------------------------------|-------------------|---------|------------|-----------------------------------------------------------------|-----------------|------------------|----------------------------------|
| Non-antibiotic pharmaceuticals (N-APs) | Acetaminophen     | ACE     | 103-90-2   | C <sub>8</sub> H <sub>9</sub> NO <sub>2</sub>                   | 0.46            | 9.38             | Analgesic, antipyretic           |
|                                        | Caffeine          | CAF     | 58-08-2    | C <sub>8</sub> H <sub>10</sub> N <sub>4</sub> O <sub>2</sub>    | -0.07           | 10.40            | Central nervous system stimulant |
|                                        | Diltiazem         | DTZ     | 42399-41-7 | C <sub>22</sub> H <sub>26</sub> N <sub>2</sub> O <sub>4</sub> S | 2.70            | 8.90             | Calcium channel blocker          |
|                                        | Carbamazepine     | CBZ     | 298-46-4   | C <sub>15</sub> H <sub>12</sub> N <sub>2</sub> O                | 2.47            | 7.00             | Anticonvulsant, antidepressant   |
| Sulfonamides (SAs)                     | Fluoxetine        | FXT     | 54910-83-3 | C <sub>17</sub> H <sub>18</sub> F <sub>3</sub> NO               | 1.80            | -                | antidepressant                   |
|                                        | Sulfadiazine      | SDZ     | 68-35-9    | C <sub>10</sub> H <sub>10</sub> N <sub>4</sub> O <sub>2</sub> S | -0.34           | 2.0/6.48         | Sulfonamide antibiotic           |
|                                        | Sulfamethoxazole  | SMX     | 723-46-6   | C <sub>10</sub> H <sub>11</sub> N <sub>3</sub> O <sub>3</sub> S | 0.89            | 1.6/5.7          | Sulfonamide antibiotic           |
|                                        | Sulfamethazine    | SMZ     | 57-68-1    | C <sub>12</sub> H <sub>14</sub> N <sub>4</sub> O <sub>2</sub> S | 0.14            | 2.65/7.65        | Sulfonamide antibiotic           |
| Tetracyclines (TCs)                    | Trimethoprim      | TMP     | 738-70-5   | C <sub>14</sub> H <sub>18</sub> N <sub>4</sub> O <sub>3</sub>   | 0.91            | 7.12             | antibacterial agent              |
|                                        | Oxytetracycline   | OTC     | 79-57-2    | C <sub>22</sub> H <sub>24</sub> N <sub>2</sub> O <sub>9</sub>   | -0.90           | 9.50             | Tetracycline antibiotic          |
|                                        | Tetracycline      | TC      | 60-54-8    | C <sub>22</sub> H <sub>24</sub> N <sub>2</sub> O <sub>8</sub>   | -1.37           | 3.30             | Tetracycline antibiotic          |
|                                        | Chlortetracycline | CTC     | 57-62-5    | C <sub>22</sub> H <sub>23</sub> ClN <sub>2</sub> O <sub>8</sub> | -               | 3.30/7.55/9.33   | Tetracycline antibiotic          |
| Macrolides (MCs)                       | Doxycycline       | DOX     | 564-25-0   | C <sub>22</sub> H <sub>24</sub> N <sub>2</sub> O <sub>8</sub>   | 2.37            | 3.02/7.97/9.15   | Tetracycline antibiotic          |
|                                        | Azithromycin      | AZM     | 83905-01-5 | C <sub>38</sub> H <sub>72</sub> N <sub>2</sub> O <sub>12</sub>  | 4.02            | 8.74             | Macrolide antibiotic             |
|                                        | Erythromycin      | ERY     | 114-07-8   | C <sub>37</sub> H <sub>67</sub> NO <sub>13</sub>                | 3.06            | 8.90             | Macrolide antibiotic             |
| Quinolones (QNs)                       | Tylosin           | TYL     | 1401-69-0  | C <sub>46</sub> H <sub>77</sub> NO <sub>17</sub>                | 1.05            | 7.10             | Macrolide antibiotic             |
|                                        | Lincomycin        | LIN     | 154-21-2   | C <sub>18</sub> H <sub>34</sub> N <sub>2</sub> O <sub>6</sub> S | 0.56            | 7.60             | Lincosamide antibiotic           |
|                                        | Ofloxacin         | OFL     | 82419-36-1 | C <sub>18</sub> H <sub>20</sub> FN <sub>3</sub> O <sub>4</sub>  | -0.02           | -                | Quinolone antibiotic             |

a: Stamatis and Konstantinou, 2013; Salgado et al., 2012; Chen et al., 2014; Yang et al., 2011; Marczak et al., 2015

Table S2. Sampling site information for samples of Guanting Reservoir

| Sites | Coordinates                   | Date            | Location           |
|-------|-------------------------------|-----------------|--------------------|
| L01   | 115°46'36.84"E 40°22'16.752"N | August, 01 2017 | Guanting Reservoir |
| L02   | 115°45'43.56"E 40°21'43.344"N | August, 01 2017 | Guanting Reservoir |
| L03   | 115°45'48.24"E 40°21'38.592"N | August, 01 2017 | Guanting Reservoir |
| L04   | 115°45'54.72"E 40°21'27.072"N | August, 01 2017 | Guanting Reservoir |
| L05   | 115°44'30.12"E 40°20'52.26"N  | August, 01 2017 | Guanting Reservoir |
| L06   | 115°44'13.56"E 40°21'5.04"N   | August, 01 2017 | Guanting Reservoir |
| L07   | 115°43'54.48"E 40°21'13.32"N  | August, 01 2017 | Guanting Reservoir |
| L08   | 115°43'11.99"E 40°20'55.788"N | August, 01 2017 | Guanting Reservoir |
| L09   | 115°41'25.08"E 40°20'20.04"N  | August, 01 2017 | Guanting Reservoir |
| L10   | 115°37'35.40"E 40°18'25.668"N | August, 01 2017 | Guanting Reservoir |
| L11   | 115°37'9.12"E 40°17'29.076"N  | August, 01 2017 | Guanting Reservoir |
| L12   | 115°36'59.04"E 40°16'56.279"N | August, 01 2017 | Guanting Reservoir |
| L13   | 115°36'26.48"E 40°16'18.336"N | August, 01 2017 | Guanting Reservoir |
| L14   | 115°36'9.72"E 40°14'7.799"N   | August, 01 2017 | Guanting Reservoir |
| R01   | 115°52'28.20"E 40°26'47.868"N | August, 04 2017 | Guishui River      |
| R02   | 114°30'20.52"E 40°37'1.235"N  | August, 02 2017 | Yongding River     |
| R03   | 115°28'1.20"E 40°21'25.128"N  | August, 02 2017 | Yongding River     |
| R04   | 115°21'18.72"E 40°21'15.696"N | August, 02 2017 | Sanggan River      |
| R05   | 115°12'40.32"E 40°21'30.96"N  | August, 02 2017 | Sanggan River      |
| R06   | 115°18'20.88"E 40°24'52.344"N | August, 02 2017 | Yanghe River       |
| R07   | 115°7'9.84"E 40°31'4.295"N    | August, 02 2017 | Yanghe River       |
| R08   | 114°58'19.91"E 40°37'10.488"N | August, 02 2017 | Yanghe River       |

|     |                |                |                 |                  |
|-----|----------------|----------------|-----------------|------------------|
| R09 | 114°49'3.36"E  | 40°40'49.656"N | August, 02 2017 | Yanghe River     |
| R10 | 114°50'25.44"E | 40°42'47.268"N | August, 03 2017 | Qingshui River   |
| R11 | 114°45'38.16"E | 40°42'55.44"N  | August, 03 2017 | Yanghe River     |
| R12 | 114°30'20.52"E | 40°40'29.136"N | August, 03 2017 | Yanghe River     |
| R13 | 114°25'39.36"E | 40°37'1.236"N  | August, 03 2017 | Nanyanghe River  |
| R14 | 114°28'33.96"E | 40°41'3.48"N   | August, 03 2017 | Dongyanghe River |

Table S3. Experimental conditions of electrospray tandem mass spectrometry

| Analytes | Parent ion<br>(m/z) | Daughter ion<br>(m/z) | Fragmentor/<br>V | Collision energy/<br>eV |
|----------|---------------------|-----------------------|------------------|-------------------------|
| ACE      | 152                 | 110                   | 90               | 15                      |
|          |                     | 65                    | 90               | 35                      |
| CAF      | 195                 | 138                   | 110              | 15                      |
|          |                     | 110                   | 110              | 25                      |
| DTZ      | 415                 | 178                   | 130              | 25                      |
|          |                     | 150                   | 130              | 25                      |
| CBZ      | 237                 | 194                   | 110              | 15                      |
|          |                     | 179                   | 110              | 35                      |
| FXT      | 310                 | 148                   | 110              | 5                       |
|          |                     | 156                   | 110              | 15                      |
| SDZ      | 251.2               | 92                    | 110              | 25                      |
|          |                     | 156                   | 110              | 15                      |
| SMX      | 254                 | 92                    | 110              | 25                      |
|          |                     | 186                   | 90               | 25                      |
| SMZ      | 279                 | 156                   | 90               | 25                      |
|          |                     | 261                   | 110              | 25                      |
| TMP      | 291                 | 230                   | 110              | 25                      |
|          |                     | 444                   | 130              | 13                      |
| OTC      | 461                 | 426                   | 130              | 17                      |
|          |                     | 427                   | 110              | 5                       |
| TC       | 445.2               | 410                   | 110              | 15                      |
|          |                     | 462                   | 110              | 15                      |
| CTC      | 479                 | 197                   | 110              | 35                      |
|          |                     | 428                   | 110              | 15                      |
| DOX      | 445..2              | 154                   | 110              | 35                      |
|          |                     | 591.2                 | 130              | 30                      |
| AZM      | 749.5               | 158                   | 130              | 35                      |
|          |                     | 576                   | 90               | 15                      |
| ERY      | 734.5               | 158                   | 90               | 35                      |
|          |                     | 772                   | 110              | 35                      |
| TYL      | 916.3               | 174                   | 110              | 35                      |

|                                      |       |       |     |    |
|--------------------------------------|-------|-------|-----|----|
| LIN                                  | 407   | 359.1 | 110 | 15 |
|                                      |       | 126   | 110 | 25 |
| OFX                                  | 362.2 | 318   | 90  | 15 |
|                                      |       | 261   | 90  | 25 |
| SMZ- <sup>13</sup> C <sub>6</sub>    | 285   | 186   | 90  | 25 |
|                                      |       | 162   | 90  | 25 |
| ERY- <sup>13</sup> C, d <sub>3</sub> | 738.5 | 587   | 90  | 15 |
|                                      |       | 160   | 90  | 35 |
| ATZ-d <sub>5</sub>                   | 221   | 179   | 110 | 15 |
|                                      |       | 137   | 110 | 15 |

Table S4. Water quality parameters in surface water samples collected from Guanting Reservoir and its upstream rivers

| Sites | DOC (mg·L <sup>-1</sup> ) | TN (mg·L <sup>-1</sup> ) | TP (mg·L <sup>-1</sup> ) | NH <sub>3</sub> -N (mg·L <sup>-1</sup> ) |
|-------|---------------------------|--------------------------|--------------------------|------------------------------------------|
| L01   | 13.17                     | 0.326                    | 0.013                    | 0.27                                     |
| L02   | 10.11                     | 0.280                    | 0.022                    | 0.16                                     |
| L03   | 10.75                     | 0.234                    | 0.026                    | 0.14                                     |
| L04   | 11.52                     | 0.222                    | 0.023                    | 0.16                                     |
| L05   | 11.65                     | 0.230                    | 0.016                    | 0.30                                     |
| L06   | 11.47                     | 0.329                    | 0.016                    | 0.11                                     |
| L07   | 12.52                     | 0.322                    | 0.020                    | 0.11                                     |
| L08   | 10.58                     | 0.249                    | 0.025                    | 0.10                                     |
| L09   | 11.24                     | 0.276                    | 0.012                    | 0.25                                     |
| L10   | 10.48                     | 0.234                    | 0.030                    | 0.16                                     |
| L11   | 7.98                      | 0.257                    | 0.027                    | 0.18                                     |
| L12   | 9.58                      | 0.268                    | 0.023                    | 0.12                                     |
| L13   | 10.89                     | 0.130                    | 0.026                    | 0.19                                     |
| L14   | 7.83                      | 0.283                    | 0.039                    | 0.22                                     |
| R01   | 14.65                     | 1.261                    | 0.140                    | 0.26                                     |
| R02   | 6.33                      | 2.024                    | 0.325                    | 0.16                                     |
| R03   | 8.74                      | 0.188                    | 0.075                    | 0.12                                     |
| R04   | 17.19                     | 0.479                    | 0.037                    | 0.59                                     |
| R05   | 3.20                      | 1.775                    | 0.025                    | 0.23                                     |
| R06   | 4.64                      | 1.073                    | 0.104                    | 0.16                                     |
| R07   | 11.67                     | 2.116                    | 0.467                    | 0.77                                     |
| R08   | 21.98                     | 1.100                    | 1.639                    | 0.87                                     |
| R09   | 14.47                     | 0.855                    | 0.143                    | 19.70                                    |
| R10   | 13.55                     | 1.146                    | 0.206                    | 1.02                                     |
| R11   | 6.45                      | 0.164                    | 0.083                    | 0.45                                     |
| R12   | 2.33                      | 0.617                    | 0.089                    | 0.04                                     |
| R13   | 0.61                      | 0.398                    | 0.080                    | 0.06                                     |
| R14   | 1.91                      | 0.797                    | 0.007                    | 0.07                                     |

Table S5. Environmental risk assessment for selected PPCPs in GTR and its upstream rivers

| Analytes | EC50 (mg/L) | PNEC ( $\mu\text{g}\cdot\text{L}^{-1}$ ) | Maxium MEC ( $\text{ng}\cdot\text{L}^{-1}$ ) |                 | RQ       |                 |
|----------|-------------|------------------------------------------|----------------------------------------------|-----------------|----------|-----------------|
|          |             |                                          | GTR                                          | Upstream rivers | GTR      | Upstream rivers |
| ACE      | 9.2         | 9.2 <sup>a</sup>                         | 506.47                                       | 901.73          | 5.51E-02 | 9.80E-02        |
| CAF      | 69          | 69 <sup>b</sup>                          | 620.39                                       | 707.51          | 0.009    | 0.010           |
| DTZ      | 8.2         | 8.2 <sup>c</sup>                         | 17.37                                        | 8.64            | 2.12E-03 | 1.05E-03        |
| CBZ      | 31.6        | 31.6 <sup>c</sup>                        | 5.90                                         | 11.47           | 0.000    | 0.000           |
| FXT      | 41          | 41 <sup>d</sup>                          | 3.40                                         | 4.45            | 8.29E-05 | 1.09E-04        |
| SDZ      | 10          | 10 <sup>e</sup>                          | 23.51                                        | 20.58           | 0.002    | 2.06E-03        |
| SMX      | 20          | 20 <sup>a</sup>                          | 44.39                                        | 42.59           | 0.002    | 0.002           |
| SMZ      | 15.6        | 15.63 <sup>e</sup>                       | 25.68                                        | 14.11           | 0.002    | 9.03E-04        |
| TMP      | 1.0         | 1 <sup>a</sup>                           | 15.26                                        | 20.23           | 0.015    | 0.020           |
| OTC      | 2.0         | 2 <sup>e</sup>                           | 30.45                                        | 36.26           | 0.015    | 0.018           |
| TC       | 3400        | 3400 <sup>e</sup>                        | 14.86                                        | 18.86           | 4.37E-06 | 5.55E-06        |
| CTC      | 5.0         | 5 <sup>f</sup>                           | 15.38                                        | 19.68           | 0.003    | 3.94E-03        |
| DOX      | 430         | 430 <sup>d</sup>                         | 10.11                                        | 12.76           | 2.35E-05 | 2.97E-05        |
| AZM      | 0.45        | 0.454 <sup>g</sup>                       | 16.72                                        | 25.71           | 0.037    | 0.057           |
| ERY      | 0.04        | 0.04 <sup>a</sup>                        | 27.56                                        | 63.69           | 0.689    | 1.592           |
| TYL      | 0.34        | 0.34 <sup>g</sup>                        | 1.49                                         | 0.00            | 0.004    | 0.000           |
| LIN      | 14.0        | 13.98 <sup>h</sup>                       | 10.53                                        | 59.19           | 0.001    | 0.004           |
| OFL      | 100         | 100 <sup>e</sup>                         | 26.37                                        | 36.73           | 2.64E-04 | 3.67E-04        |

<sup>a</sup>: Lin et al., 2008; <sup>b</sup>: Muñoz et al., 2008; <sup>c</sup>: Kim et al., 2007; <sup>d</sup>: Schwab et al., 2005; <sup>e</sup>: Bu et al., 2013; <sup>f</sup>: Ji et al., 2012; <sup>g</sup>: Verlicchi et al., 2014; <sup>h</sup>: Isidori et al., 2005

## References:

- Bu, Q., Wang, B., Huang, J., Deng, S., Yu, G., 2013. Pharmaceuticals and personal care products in the aquatic environment in China: a review. *Journal of Hazardous Materials.* 262,189-211.
- Isidori, M., Lavorgna, M., Nardelli A, Pascarella, L., Parrella, A., 2005. Toxic and genotoxic evaluation of six antibiotics on non-target organisms. *Science of the Total Environment.* 346, 87-98.
- Ji K, Kim S, Han S, Seo, J., Lee, S., Park, Y., Choi, K., Kho, Y.L., Kim, P.G., Park, J., Chio, K., 2012. Risk assessment of chlortetracycline, oxytetracycline, sulfamethazine, sulfathiazole, and erythromycin in aquatic environment: are the current environmental concentrations safe?. *Ecotoxicology.* 21, 2031-2050.
- Kim, Y., Choi, K., Jung, J., Jung, J.Y. Park, S.J., Kim, P.G., Park, J., 2007. Aquatic toxicity of acetaminophen, carbamazepine, cimetidine, diltiazem and six major sulfonamides, and their potential ecological risks in Korea. *Environment International,* 33, 370-375.
- Lin A Y, Yu T H, Lin C F. 2008. Pharmaceutical Contamination in Residential, Industrial, and Agricultural Waste Streams: Risk to Aqueous Environments in Taiwan. *Chemosphere.* 74, 131-141.
- Marczak, M., Okoniewska, K. M., Okoniewski, J., Grabowski, T., Jaroszewski, J. J. (2015). Indirect relationship between lipophilicity and maximum residue limit of drugs determined for fatty tissue. *Bulletin of the Veterinary Institute in Pulawy,* 59, 383-391.
- Muñoz, I., Gómez, M.J., Molina-Díaz, A., Mark, A.J., Fernández-Alba, A.R., García-Calvo, E., 2008. Ranking potential impacts of priority and emerging pollutants in urban wastewater through life cycle impact assessment. *Chemosphere,* 74, 37-44.
- Salgado, R., Marques, R., Noronha, J. P., Carvalho, G., Oehmen, A., Reis, M. A. (2012). Assessing the removal of pharmaceuticals and personal care products in a full-scale activated sludge plant. *Environmental Science and Pollution Research,* 19, 1818-1827.
- Schwab, B.W., Hayes, E.P., Fiori, J.M., Roden, N.M., Cragin, D., Meyerhoff, R.D., Vincent, J.D., Anderson, P.D., 2005. Human pharmaceuticals in US surface waters: a human health risk assessment. *Regulatory Toxicology and Pharmacology,* 42, 296-312
- Stamatis, N. K., Konstantinou, I. K. (2013). Occurrence and removal of emerging pharmaceutical, personal care compounds and caffeine tracer in municipal sewage treatment plant in Western Greece. *Journal of Environmental Science and Health. part. b: Pesticides Food Contaminants and Agricultural Wastes,* 48, 800-813.
- Verlicchi, P., Al, A.M., Jelic, A., Petrović, M., Barceló, D., 2014. Comparison of measured and predicted concentrations of selected pharmaceuticals in wastewater and surface water: a case study of a catchment area in the Po Valley (Italy). *Science of the Total Environment.* 470-471, 844-854.
- Yang, X., Flowers, R. C., Weinberg, H. S., Singer, P. C. (2011). Occurrence and removal of pharmaceuticals and personal care products (PPCPs) in an advanced wastewater reclamation plant. *Water Research,* 45, 5218–5228.
